# Supplementary material for: Investigation of Cytotoxicity and Cell Uptake of Cationic Beta-Cyclodextrins as Valid Tools in Nasal Delivery
Source: Preprints.org preprint supplement (doi:10.20944/preprints202007.0180.v1), 2020-07-09
Supplement: Supplementary file 1 [file supplementary]

1 *Supplementary Material*

2 **Investigation of cytotoxicity and cell uptake of**  
3 **cationic beta-cyclodextrins as valid tools in nasal**  
4 **delivery**

5 **Giovanna Rassu** <sup>1,§</sup>, **Silvia Fancello** <sup>2,§</sup>, **Marta Roldo** <sup>3</sup>, **Milo Malanga** <sup>4</sup>, **Lajos Szente** <sup>4</sup>, **Rossana**  
6 **Migheli** <sup>2,\*</sup>, **Elisabetta Gavini** <sup>1,\*</sup> and **Paolo Giunchedi** <sup>1</sup>

7 <sup>1</sup> Department of Chemistry and Pharmacy, University of Sassari, via Muroni 23/a, 07100 Sassari, Italy.

8 [grassu@uniss.it](mailto:grassu@uniss.it) (GR); [eligav@uniss.it](mailto:eligav@uniss.it) (EG); [pgiunc@uniss.it](mailto:pgiunc@uniss.it) (PG)

9 <sup>2</sup> Department of Medical, Surgical and Experimental Sciences, University of Sassari, viale San Pietro 43/b,  
10 07100 Sassari, Italy. [sfancello@uniss.it](mailto:sfancello@uniss.it) (SF); [rmigheli@uniss.it](mailto:rmigheli@uniss.it) (RM)

11 <sup>3</sup> School of Pharmacy and Biomedical Sciences, University of Portsmouth, Portsmouth, UK.

12 [marta.roldo@port.ac.uk](mailto:marta.roldo@port.ac.uk)

13 <sup>4</sup> CycloLab Ltd., H-1097 Budapest, Illatos út 7, Hungary. [malanga@cyclolab.hu](mailto:malanga@cyclolab.hu) (MM); [szente@cyclolab.hu](mailto:szente@cyclolab.hu)  
14 (LS)

15

16 § authors contributed equally.

17

18 \* Correspondence: [eligav@uniss.it](mailto:eligav@uniss.it); Tel.: +39 079 228 752 (EG); [rmigheli@uniss.it](mailto:rmigheli@uniss.it); Tel.: +39 079 228 528 (RM)

19

20

21

**Table 1S.** Description of beta-cyclodextrin monomers and polymers studied in this work

| Not Fluorescent                                                                        |      |                 |                 |                  |                 | Analogue fluorescent cyclodextrin    |                                                                                                                   |                     |                             |                 |                  |                 |
|----------------------------------------------------------------------------------------|------|-----------------|-----------------|------------------|-----------------|--------------------------------------|-------------------------------------------------------------------------------------------------------------------|---------------------|-----------------------------|-----------------|------------------|-----------------|
| Cyclodextrin                                                                           | Code | DS <sup>1</sup> | MW <sup>2</sup> | CLR <sup>3</sup> | CD <sup>4</sup> | Description                          | Cyclodextrin                                                                                                      | Code                | DS <sup>1</sup>             | MW <sup>2</sup> | CLR <sup>3</sup> | CD <sup>4</sup> |
| (2-Hydroxy-3-N,N,N-trimethylamino) propyl-beta-cyclodextrin chloride                   | QA   | 3               | 1589.8          | -                | 3               | cationic monomer; purity > 99%       | Quaternary ammonium-6-deoxy- 6-[(5/6)-rhodaminyl thioureido]-(2-Hydroxy-3-N,N,N-trimethylamino)-beta-cyclodextrin | <b>RBIT C-QA</b>    | 4.5 (QA)<br>1<br>(RBITC)    | 1939.8<br>6     | -                | 3.5             |
| Quaternary-ammonium-beta-cyclodextrin soluble polymer crosslinked with epichlorohydrin | QAPS | 2.2             | 40,000          | ~11              | 2.2             | cationic polymer; CD content: 50-70% | Quaternary-ammonium-rhodamine labeled beta-cyclodextrin soluble polymer crosslinked with epichlorohydrin          | <b>RBIT C-QA PS</b> | 2.2 (QA)<br>0.05<br>(RBITC) | 40,000          | ~11              | 2.2             |
| Heptakis (6-deoxy-6-amino)-beta-cyclodextrin heptahydrochloride                        | HA   | -               | 1383.3          | -                | 7               | cationic monomer; purity > 98%       |                                                                                                                   |                     |                             |                 |                  |                 |
| Soluble amino-beta-cyclodextrin polymer crosslinked with epichlorohydrin               | HAPS | 1               | 25,000          | ~10              | 1               | cationic polymer; CD content: 70%    |                                                                                                                   |                     |                             |                 |                  |                 |
| (2-Hydroxypropyl)- beta-cyclodextrin                                                   | HP   | 4.5             | 1400            | -                | -               | control monomer                      | 6-deoxy-6-[(5/6)-rhodaminylthioureido]- hydroxypropyl-beta-cyclodextrin                                           | <b>RBIT C-HP</b>    | 4.7 (HP)<br>0.5<br>(RBITC)  | 1675.0<br>7     |                  | 1*              |
| Soluble $\beta$ -cyclodextrin polymer crosslinked with epichlorohydrin                 | PS   | -               | 92,000          | ~11              | -               | control polymer; CD content: 70%     | Rhodamine labeled BCD soluble polymer crosslinked with epichlorohydrin                                            | <b>RBIT C-PS</b>    | 0.05<br>(RBITC)             | 100,00<br>0     | ~11              | -               |

<sup>1</sup>DS: Average Degree of Substitution; <sup>2</sup>MW: Average Molecular Weight (g/mol); <sup>3</sup>CLR: Cross-Linking Ratio (mol epichlorohydrin/mol CD); <sup>4</sup>CD: Cationic Density (cationic groups per cyclodextrin unit). \* anionic group per cyclodextrin unit

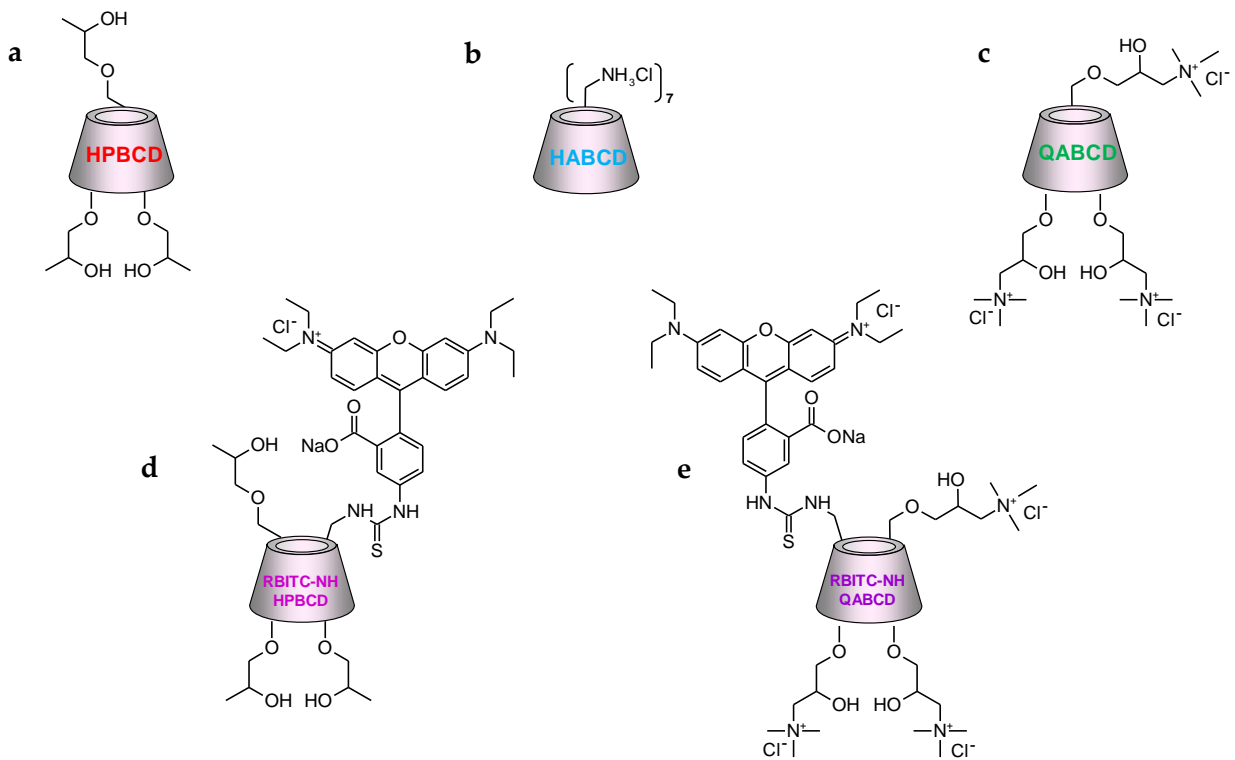

25

26 **Figure 1S.** Cartoon representations for beta-cyclodextrin monomers: a) HP; b) HA; c) QA; d) RBITC-HP; e)  
 27 RBITC-QA.

28

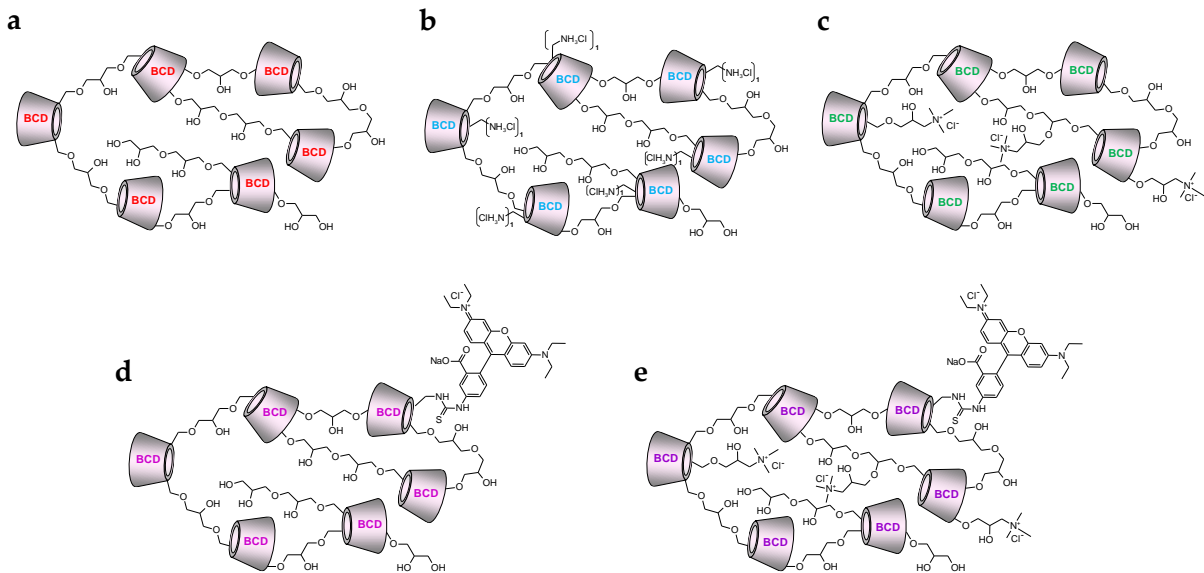

29

30 **Figure 2S.** Cartoon representations for beta-cyclodextrin polymers: : a) PS; b) HAPS; c) QAPS; d)  
 31 RBITC-PS; e) RBITC-QAPS.

32

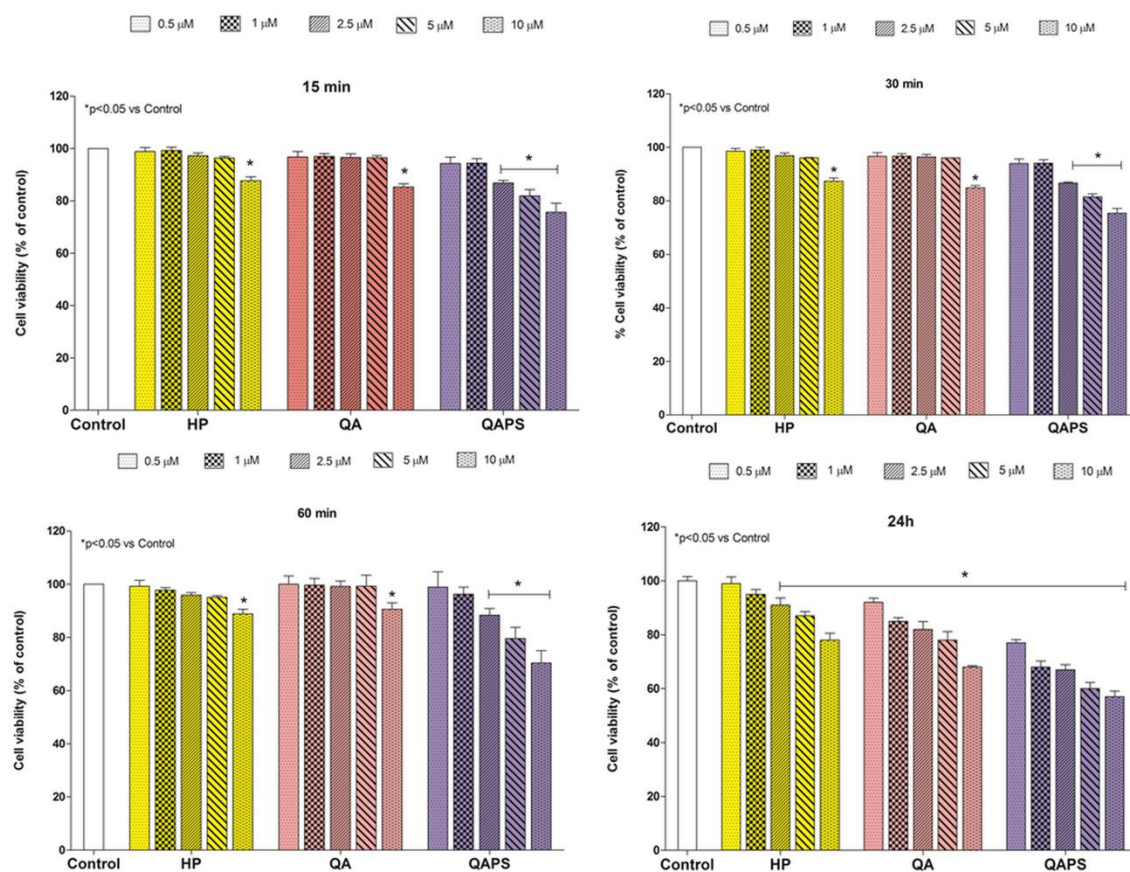

**Figure 3S.** Effect of different concentrations (0.5 - 1 - 2.5 - 5 - 10 μM) of HP, QA and QAPS on PC12 cell viability at increasing times of exposure (15, 30, 60 min and 24h). \*p<0.05 vs Control.

33  
34  
35  
36

37

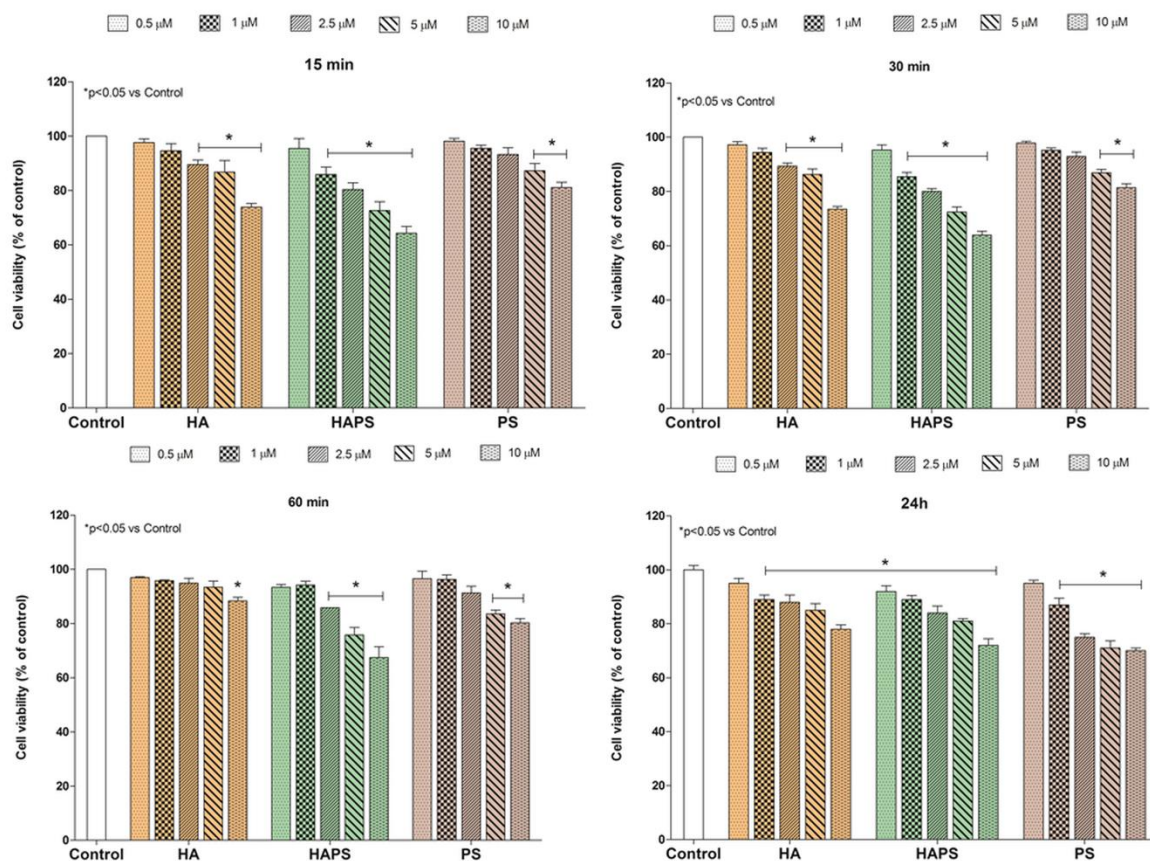

38

39

40

**Figure 4S.** Effect of different concentrations (0.5 - 1 - 2.5 - 5 - 10 μM) of HA, HAPS and PS on PC12 cell viability at increasing times of exposure (15, 30, 60 min and 24h). \*p < 0.05 vs Control.

41

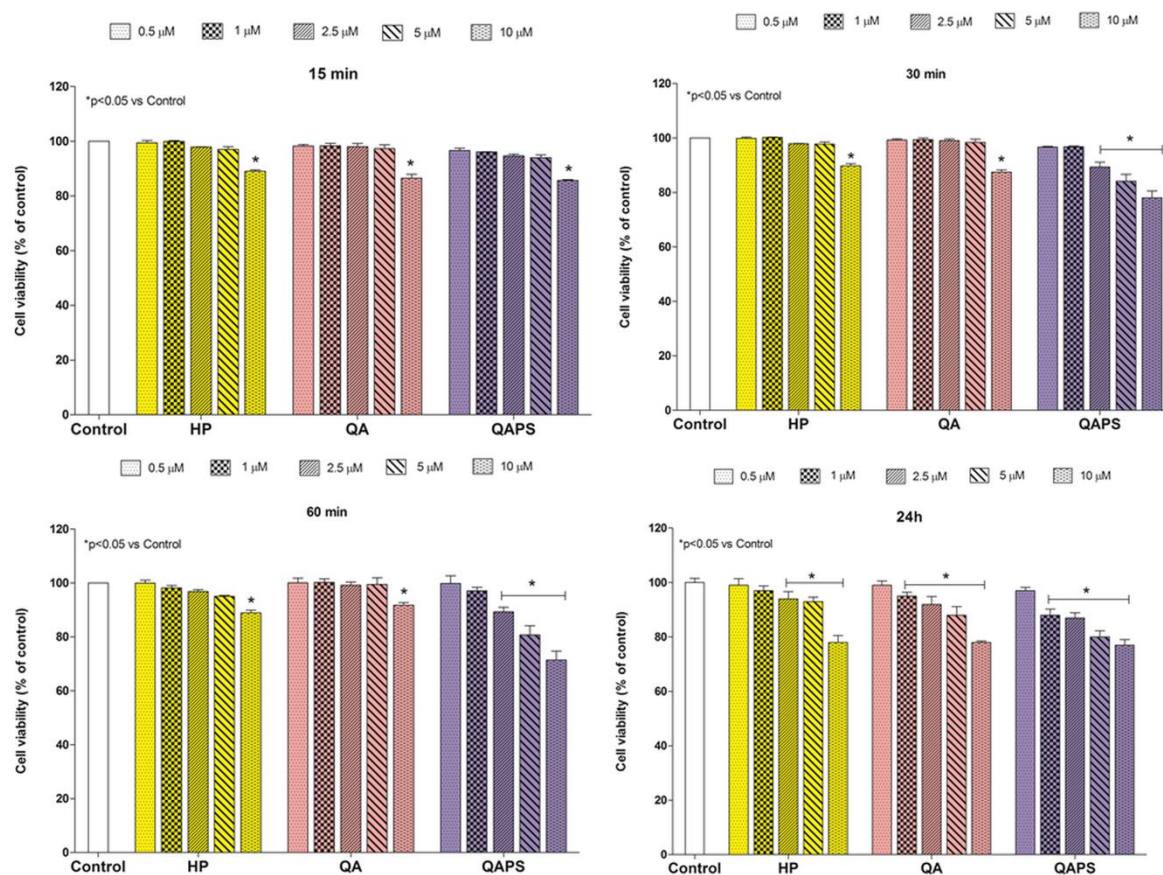

42  
43  
44

**Figure 5S.** Effect of different concentrations (0.5 - 1 - 2.5 - 5 - 10 μM) of HP, QA and QAPS on CACO-2 cell viability at increasing times of exposure (15, 30, 60 min and 24h). \*p<0.05 vs Control.

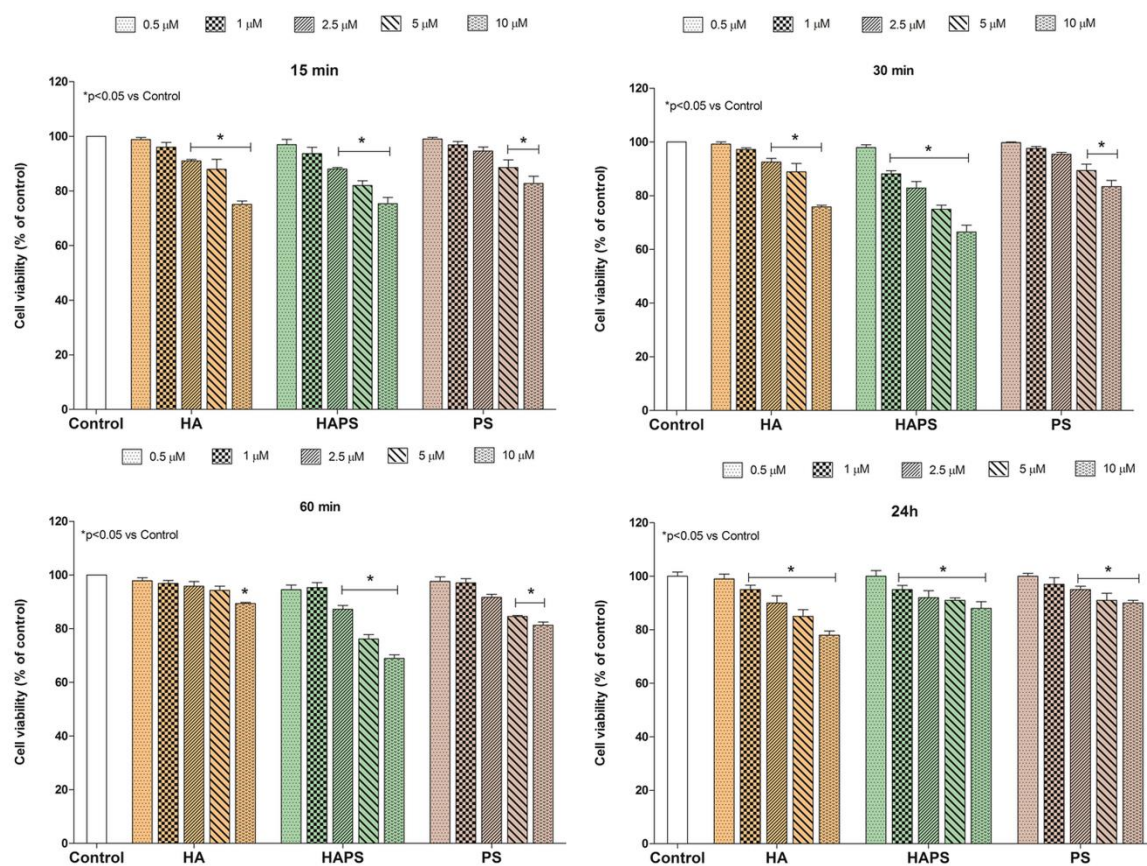

45  
46  
47

**Figure 6S.** Effect of different concentrations (0.5 - 1 - 2.5 - 5 - 10 μM) of HA, HAPS and PS on CACO-2 cell viability at increasing times of exposure (15, 30, 60 min and 24h). \*p < 0.05 vs Control.
